# Supplementary material for: Fluoride scavengeable Sb2O3-functionalized poly(imide) separators for prolonged cycling of lithium-ion batteries
Source: Royal Society of Chemistry journal article supplement (doi:10.1039/d4cc02637c), 2024-01-01
Supplement: d4cc02637c1.pdf [file d4cc02637c1.pdf]

## Electronic Supplementary Information

### Fluoride scavengeable Sb<sub>2</sub>O<sub>3</sub>-functionalized poly(imide) separators for prolonged cycling of lithium-ion batteries

Juhwi Park<sup>ab</sup>, Ji Seong Heo<sup>ab</sup>, Sung Joon Park<sup>c</sup>, Ki Jae Kim<sup>\*c</sup> and Taeun Yim<sup>\*ab</sup>

<sup>a</sup>*Advanced Batteries Laboratory, Department of Chemistry, Incheon National University, 119*

*Academy-ro, Yeonsu-gu, Incheon 22012, Republic of Korea*

<sup>b</sup>*Research Institute of Basic Sciences, College of Natural Science, Incheon National University, 119*

*Academy-ro, Yeonsu-gu, Incheon 22012, Republic of Korea*

<sup>c</sup>*Advanced Batteries Laboratory, Department of energy science, Sungkyunkwan University, 2066 seobu-ro,*

*Jangan-gu, Suwon 16419, Republic of Korea.*

*Corresponding Author: yte0102@inu.ac.kr (T. Yim) and kijaekim@skku.edu*

## **1. Experimental**

### **1.1 Sample preparation**

To prepare the  $\text{Sb}_2\text{O}_3$  slurry, 0.0325 g of PVdF-HFP binder was dissolved in NMP to form the binder solution. Then, 0.163 g of  $\text{Sb}_2\text{O}_3$  was dispersed in the binder solution for one hour. Subsequently, the coating slurry was cast onto the PI separators using a doctor blade. The loading of the material was controlled according to the doctor blade. The loading of the  $\text{Sb}_2\text{O}_3$  coating layer was fixed at  $0.85 \text{ mg cm}^{-2}$ . The modified PI-based separators with  $\text{Sb}_2\text{O}_3$  were used without additional treatment.

### **1.2 Materials characterization**

The surface morphology of the PI-based separator was analyzed using scanning electron microscopy (SEM). Mechanical properties were measured using a tensile testing machine with material samples measuring  $1.5 \text{ cm} \times 5.0 \text{ cm}$ . The characteristics of the PI-based separators with varying porosity were measured using a Gurley densometer. Electrolyte absorption rate was calculated by dividing the difference in weight of the PI-based separator before and after immersion in the electrolyte by the weight before immersion in the electrolyte. In addition, 0.1 mL electrolyte was dropped on the separator to compare the degree of absorption after 1 minute, and the angle of the electrolyte was confirmed through the contact angle. To compare the thermal contraction of separators as temperature increases, PE- and PI-based separators were stored at room temperature at 80, 135, 150, 180, and 200 °C for 30 minutes and then naturally cooled to compare thermal contraction rates. To observe the endothermic behavior of the  $\text{Sb}_2\text{O}_3$  precursor through its reaction with halogen elements, 2 mg  $\text{Sb}_2\text{O}_3$  and 2  $\mu\text{L}$  electrolyte were added and analyzed using differential scanning calorimetry (DSC). This was carried out in  $\text{N}_2$  atmosphere from room

temperature to 300 °C at 10 °C min<sup>-1</sup>. Additionally, DSC was used to observe the O<sub>2</sub> release behavior occurring from the cathode when the temperature increased. After charging the NCM/Li cell once at 0.2 C-rate using a Sb<sub>2</sub>O<sub>3</sub> coated separator, the cathode was recovered and the charge was carried out in N<sub>2</sub> atmosphere at 5 °C min<sup>-1</sup> from room temperature to 200 °C.

### 1.3 Electrochemical measurements

To confirm the electrochemical stability of the PE- and PI-based separators, a three-electrode cell was assembled with Li metal (reference and counter electrodes) and glassy carbon (working electrode) using a potentiostat (VSP, Biologic). The cell was scanned at 1 mV s<sup>-1</sup> from the open circuit potential to 0.0 V (vs. Li/Li<sup>+</sup>) to determine electrochemical reduction stability and electrochemically reduced by scanned at 1 mV s<sup>-1</sup> to 4.5 V (vs. Li/Li<sup>+</sup>).

A 2032 type full cell was manufactured to evaluate electrochemical performance. The full cell consists of LiNi<sub>0.8</sub>Co<sub>0.1</sub>Mn<sub>0.1</sub>O<sub>2</sub> (NCM811, L&F) cathode, natural graphite anode (BTR), electrolyte and separator (loading densities of NCM811 cathode and graphite anode were 7.12 and 4.17 mg cm<sup>-2</sup>, respectively). After assembling the cells, they were aged for 12 hours. The cell was then charged from 2.8 V (vs. Li/Li<sup>+</sup>) to 4.2 V (vs. Li/Li<sup>+</sup>) for 2 cycles at 0.1 C (formation) and then from 3.0 V (vs. Li/Li<sup>+</sup>) to 4.2 V (vs. Li/Li<sup>+</sup>) were performed for 100 cycles at 1.0 C. Additionally, a water-containing electrolyte solution of 500 ppm was prepared to evaluate the electrochemical performance in the presence of excess H<sub>2</sub>O and HF. A 2032 type full cell was manufactured and electrochemical evaluation was conducted under the same conditions as above.

The cycled cathode surface and morphology were analyzed using a Scanning Electron microscope (SEM). The chemical composition with the cycled cathode surface was analyzed using X-ray Photoelectron Spectroscopy (XPS). The fitting of each XPS peak was performed based on the C–C peak (285.0 eV).

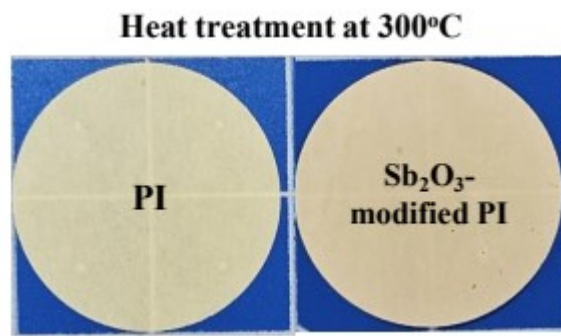

**Figure S1.** Shrinkage tests of the PI and Sb<sub>2</sub>O<sub>3</sub>-modified PI separators up to 300°C.

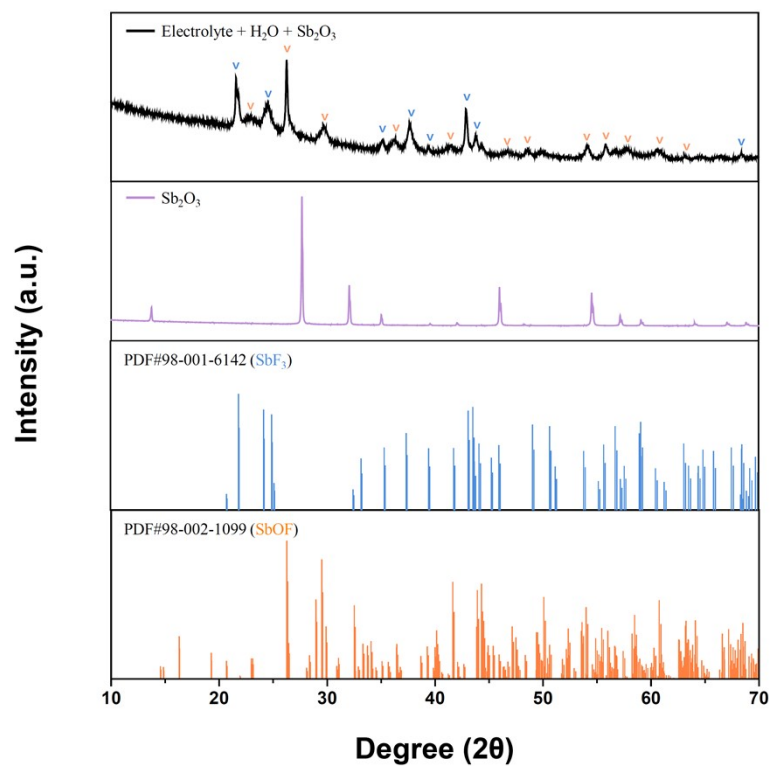

**Figure S2.** XRD results of Sb<sub>2</sub>O<sub>3</sub> and solidified products after chemical reaction of electrolyte, H<sub>2</sub>O, and Sb<sub>2</sub>O<sub>3</sub>.

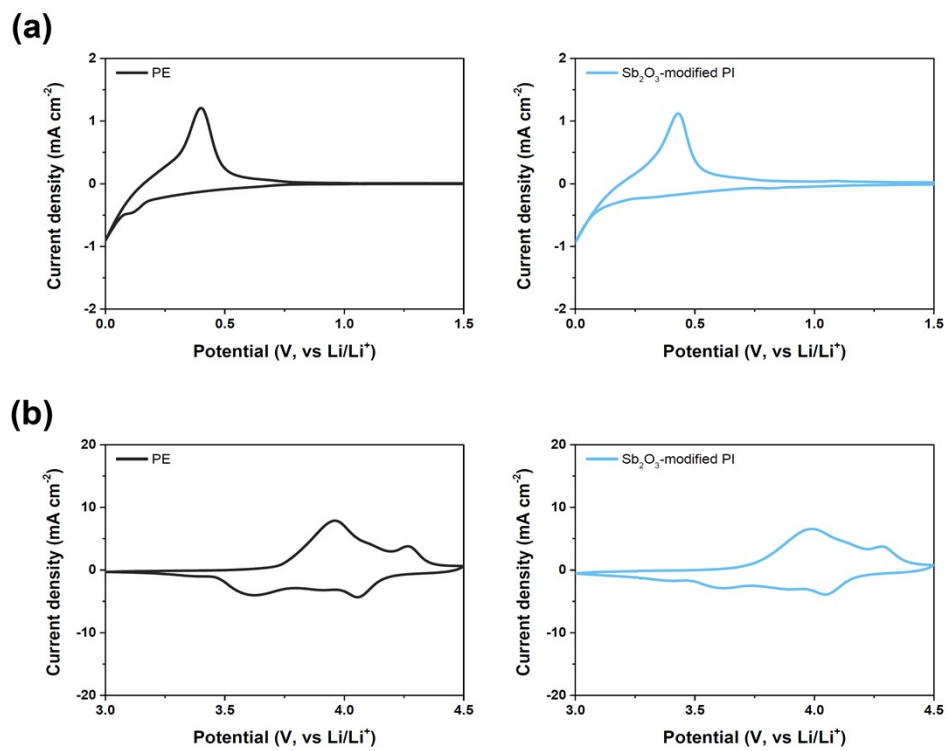

**Figure S3.** Cyclic voltammetry of the PI and  $\text{Sb}_2\text{O}_3$ -modified PI separators for (a) graphite anode and (b) NCM811 cathode.
